# Supplementary material
Source: publisher figshare collection journal article supplement (https://karger.figshare.com/ndownloader/files/13786589)
Supplement: Supplementary file 1 [file 13786589]

## Supplementary Material

# Predictive Value of Age-Bilirubin-International Normalized Ratio-Creatinine Score in Short-Term Survival of Acute-on-Chronic Hepatitis B Liver Failure

Liang Chen<sup>a,b</sup> Jun Zheng<sup>a,b</sup> Jianye Cai<sup>a,b</sup> Yusheng Jie<sup>b,c</sup> Yingcai Zhang<sup>a,b</sup>  
Hui Li<sup>a,b</sup> Tongyu Lu<sup>a,b</sup> Liying He<sup>d</sup> Cuicui Xiao<sup>b,e</sup> Kaining Zeng<sup>a,b</sup>  
Hongyuan Fu<sup>a,b</sup> Haibo Li<sup>a,b</sup> Bin Ouyang<sup>f</sup> Guihua Chen<sup>a,b</sup> Jia Yao<sup>a,b</sup> Jiao Gong<sup>g</sup> Yang  
Yang<sup>a,b</sup>

<sup>a</sup>Department of Hepatic Surgery, The Third Affiliated Hospital, Sun Yat-sen University, Guangdong, <sup>b</sup>Guangdong Key Laboratory of Liver Disease Research, Key Laboratory of Liver disease biotherapy and Translational Medicine of Guangdong Higher Education Institute, The Third Affiliated Hospital, Sun Yat-sen University, Guangdong, <sup>c</sup>Department of Infectious Diseases, The Third Affiliated Hospital, Sun Yat-sen University, Guangdong, <sup>d</sup>Department of Gastroenterology, Guangzhou Women and Children's Medical Center, Guangzhou, <sup>e</sup>Biological Therapy Center, The Third Affiliated Hospital, Sun Yat-sen University, Guangdong, <sup>f</sup>Department of Andrology, Guangzhou First People's Hospital, School of Medicine, South China University of Technology, Guangzhou, <sup>g</sup>Department of Laboratory Medicine, The Third Affiliated Hospital, Sun Yat-sen University, Guangdong, China

Supplementary Figure S1

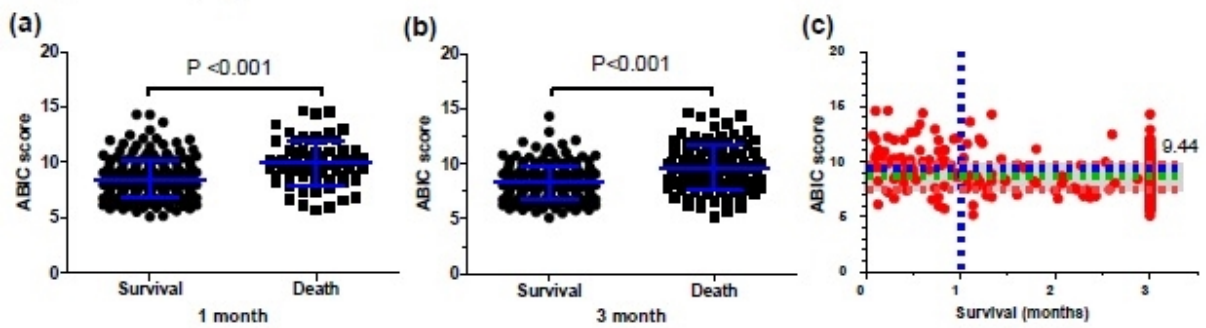

## Supplemental materials

### Figure S1.

Sensitivities and specificities for ABIC score, CLIF-C OF score, Child-Pugh score and MELD score in predicting 1-month (a) and 3-month (c) mortality of patients with ACLF satisfying EASL criteria. Kaplan-Meier survival curves of patients stratified by the optimal cut-off values of ABIC score within 1 month (b) and 3 months (d).

ABIC score, age-bilirubin-international-normalized ratio-creatinine score; ACLF, acute-on chronic liver failure; CLIF-C OF score, chronic liver failure Consortium Organ Failure score; EASL, European Association for the Study of the Liver; MELD, model for end-stage liver diseases.
